# Supplementary material for: Deglycosylation Differentially Regulates Weaned Porcine Gut Alkaline Phosphatase Isoform Functionality along the Longitudinal Axis
Source: MDPI journal article supplement (doi:10.3390/pathogens12030407), 2023-03-03
Supplement: s1 [file s1]

## Supplemental Materials

**Table S1: Formulation of the experimental weanling pig diet (on as-fed basis).**

| Item                                         | g/kg diet |
|----------------------------------------------|-----------|
| Corn                                         | 513.8     |
| Cornstarch <sup>1</sup>                      | 3.2       |
| Soybean meal                                 | 320.0     |
| Dried whey powder                            | 120.0     |
| Animal fat-oil blend                         | 5.2       |
| Lysine-HCl (79%)                             | 2.8       |
| DL-Methionine (purity, 99%)                  | 1.5       |
| L-Threonine (99%)                            | 1.0       |
| Monocalcium phosphate                        | 10.5      |
| Limestone (CaCO <sub>3</sub> ) <sup>2</sup>  | 11.2      |
| Iodized salt                                 | 2.5       |
| Vitamin-Mineral premix <sup>3</sup>          | 5.0       |
| Sweetener                                    | 0.5       |
| Titanium oxide <sup>5</sup>                  | 3.0       |
| Digestible energy, DE, <sup>6</sup> kcal/g   | 3.4       |
| Crude protein, CP, <sup>7</sup> %            | 19.6      |
| Total dietary fiber, <sup>6</sup> TDF, %     | 12.7      |
| Neutral detergent fiber, NDF, <sup>6</sup> % | 7.8       |
| Acid detergent fiber, ADF, <sup>6</sup> %    | 3.6       |
| Hemicellulose, <sup>6</sup> %                | 4.2       |
| Total soluble fiber, <sup>6</sup> %          | 4.8       |

---

|                                     |     |
|-------------------------------------|-----|
| Total calcium, Ca, <sup>6</sup> %   | 0.8 |
| Total phosphorus, P, <sup>6</sup> % | 0.7 |
| Total Ca/total P ratio <sup>8</sup> | 1.2 |
| Total sodium, Na, <sup>6</sup> %    | 0.2 |
| Total chlorine, Cl, <sup>6</sup> %  | 0.4 |

---

<sup>1</sup>Conventional corn starch commercially available.

<sup>2</sup>Included the amounts of limestone (CaCO<sub>3</sub>) contributed from the DSM (Cambridge, ON, Canada)

<sup>3</sup> Swine vitamin-mineral premix from the DSM supplied the following vitamins (IU, µg, mg or g/kg diet) and trace minerals (mg/kg diet) in the diets (as-fed basis): vitamin A (Rovimix A 1000 and Rovimix AD3 1000/200), 10000 IU; vitamin E (Rovimix E 50 Adsorbate US), 40 IU; vitamin D (Rovimix AD3 1000/200), 1000 IU; vitamin K<sub>3</sub> (menadione sodium bisulfite, MSBC), 2.5 mg; pantothenic acid (Calpan Feed Xinfra), 15 mg; thiamine (vitamin B<sub>1</sub> feed grade), 1.50 mg; folic acid (Rovimix Folic 80 50), 2.0 mg; riboflavin (Rovimix B2 80 SD Totes), 5 mg; pyridoxine (vitamin B<sub>6</sub> as Pyridoxine HCl), 1.50 mg; vitamin B<sub>12</sub> (1% feed grade), 25 µg; biotin (Rovimix Biotin HP), 0.20 mg; niacin (Rovimix niacinamide), 25 mg; choline (choline chloride, 70%), 0.50 g; Cu (copper sulfate, purity 25%), 15 mg; Fe (ferrous sulfate, purity 30%), 100 mg; Mn (manganese sulfate, purity 31.5%), 20 mg; Se (sodium selenite, purity 4.0%), 0.30 mg; Zn (zinc sulfate, purity 35.5%), 105 mg; and I (potassium iodide), 0.50 mg.

<sup>4</sup>Aureomycin provides 550 mg of chlortetracycline hydrochloride per kg diet and purchased from the Floradale Feed Mill (Floradale, ON, Canada) with a veterinary prescription at the University of Guelph.

<sup>5</sup>Purchased from Fisher Scientific, Fair Lawn, NJ.

<sup>6</sup>Calculated values (NRC 1998; 2012).

<sup>7</sup>Analyzed values.

<sup>8</sup>Standardized digestible P content calculated from the NRC (2012).
